# Supplementary figures and images for: Intestinal toxicity to CTLA-4 blockade driven by IL-6 and myeloid infiltration
Source: PubMed Central journal article supplement — J Exp Med. 2022 Nov 11;220(2):e20221333. doi: 10.1084/jem.20221333 (PMC9664499; doi:10.1084/jem.20221333), 2022-11-11

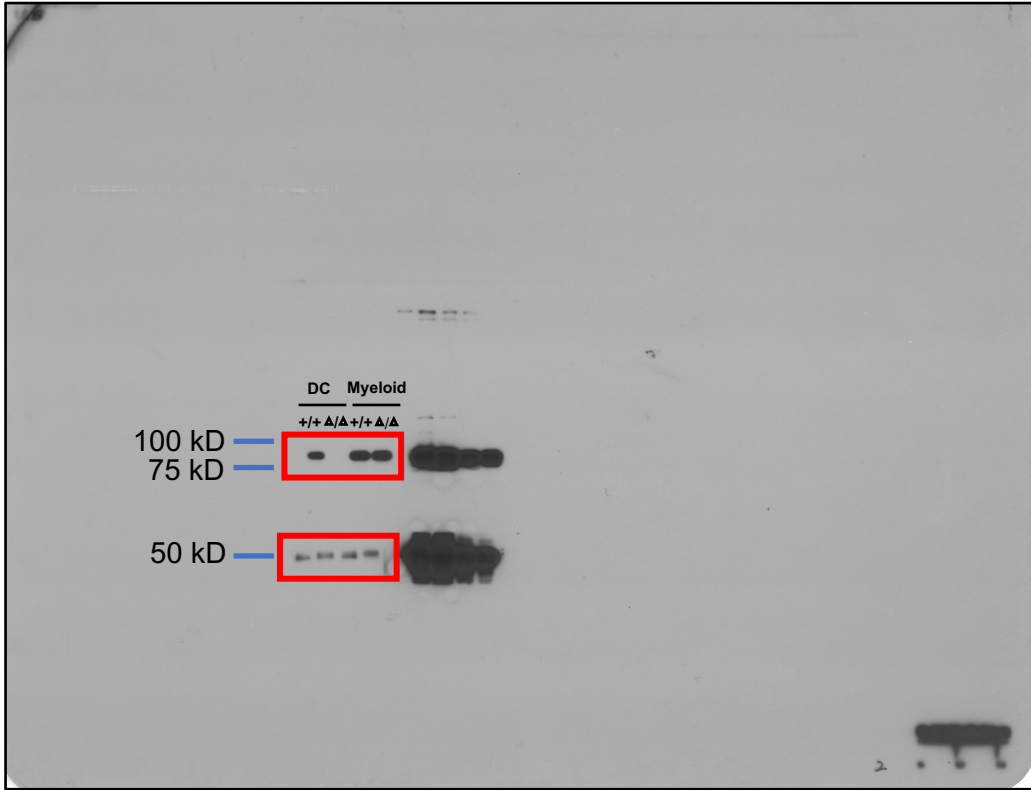

Short exposure

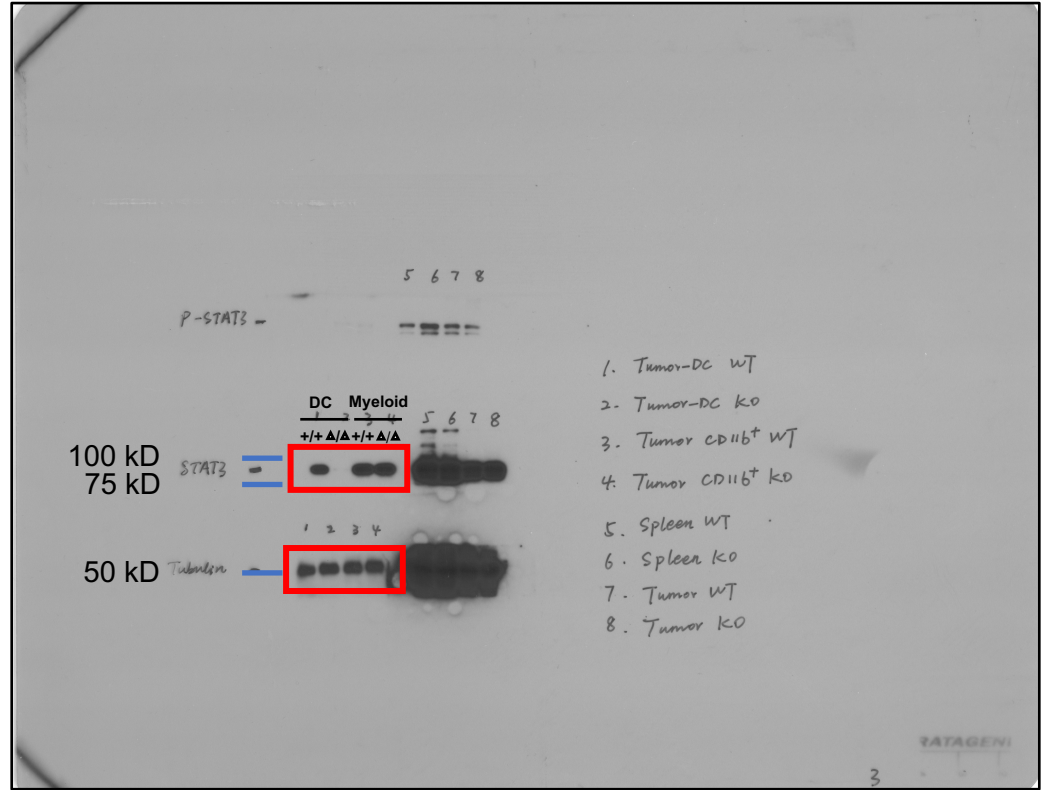

Long exposure

Supplement: JEM_20221333_SourceDataF3.pdf [file JEM_20221333_SourceDataF3.pdf]
